# Supplementary material
Source: publisher figshare collection journal article supplement (https://acs.figshare.com/ndownloader/files/17264057)
Supplement: Supplementary file 1 [file 17264057]

## Supporting Information

### Highly Efficient Analysis of Glycoprotein Sialylation in Human Serum by Simultaneous Quantification of Glycosites and Site-specific Glycoforms

*Hongqiang Qin,<sup>a, ‡</sup> Xuefang Dong,<sup>a, ‡</sup> Jiawei Mao,<sup>a,b</sup> Yao Chen,<sup>a,b</sup> Mingming Dong,<sup>a</sup> Liming Wang,<sup>c</sup> Zhimou Guo,<sup>a,\*</sup> Xinmiao Liang,<sup>a,\*</sup> Mingliang Ye<sup>a,\*</sup>*

<sup>a</sup> CAS Key Laboratory of Separation Science for Analytical Chemistry, Dalian Institute of Chemical Physics, Chinese Academy of Sciences, Dalian 116023, P. R. China

<sup>b</sup> University of Chinese Academy of Sciences, Beijing 100049, China

<sup>c</sup> The Second Affiliated Hospital of Dalian Medical University, Dalian 116027, China

## Table Captions

**Table S1.** Sialylated glycosites from human serum trypsin digest;

**Table S2.** List of intact glycopeptides and site-specific glycoforms identified;

**Table S3.** Quantification results of glycosites between HCC and control human serum;

**Table S4.** List of glycan structures identified from intact glycopeptides result;

**Table S5.** Quantification results of site-specific glycoforms between HCC and control human serum samples;

**Table S6.** Comparison results of significantly changed between glycosites and site-specific glycoforms;

**Table S7.** Total intact glycopeptides and site-specific glycoforms identified from human serum;

## Figure Captions

**Figure S1.** Overlap of N-linked glycosites identified between our data and the Uniprot database;

**Figure S2.** The distributions of site-specific glycoforms contained sialic acids and fucosylated glycan structures from human serum samples by using HILIC and HBS enrichment methods;

**Figure S3.** The distributions of site-specific glycoforms contained sialic acids and fucosylated glycan structures (A); the number distributions of sialic acids contained in the site-specific glycoforms identified from pooled HCC and Control human serum samples (B);

**Figure S4.** The numbers of unique intact glycopeptides bearing the same N-glycans identified from Control and HCC pooled human serum samples. (43 glycans identified at least 4 times were listed in Table S4);

**Figure S5.** The repeatability of the quantitative analysis of site-specific glycoforms enriched from human control groups;

**Figure S6.** Molecular function GO terms enriched for the glycoproteins identified from total glycosites (A), significant change on glycosite level (B) and significant change on site-specific glycoform level (C).

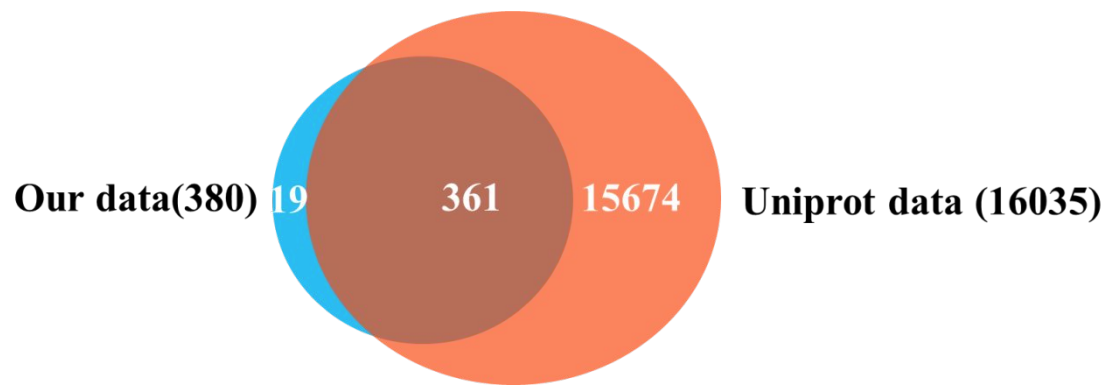

**Figure S1.** Overlap of N-linked glycosites identified between our data and the Uniprot database.

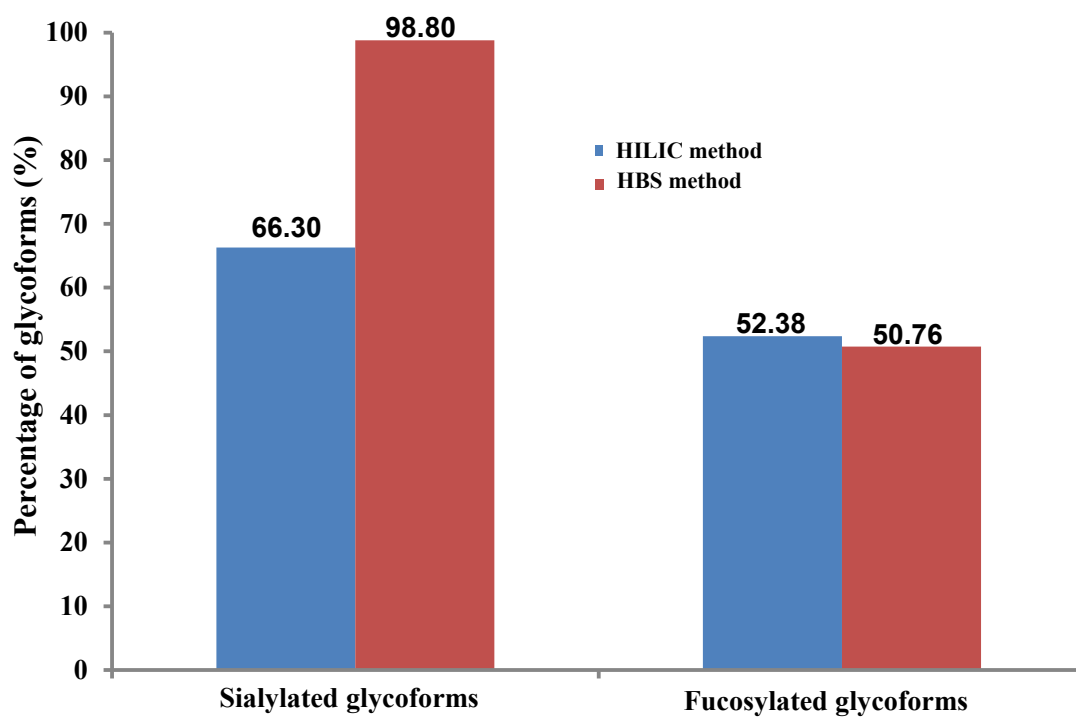

**Figure S2.** The distributions of site-specific glycoforms contained sialic acids and fucosylated glycan structures from human serum samples by using HILIC and HBS enrichment methods.

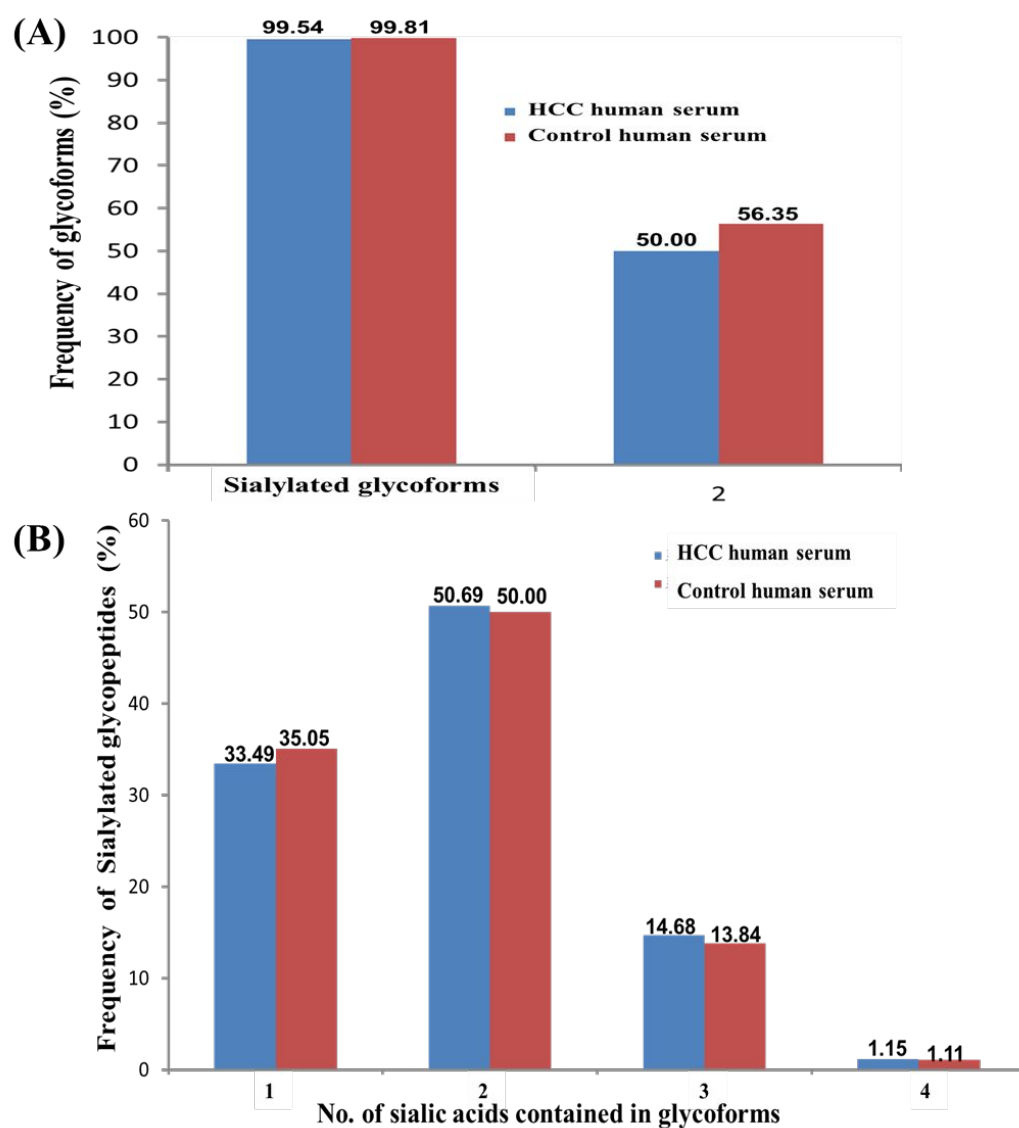

**Figure S3.** The distributions of site-specific glycoforms contained sialic acids and fucosylated glycan structures (A); the number distributions of sialic acids contained in the site-specific glycoforms identified from pooled HCC and Control human serum samples (B).

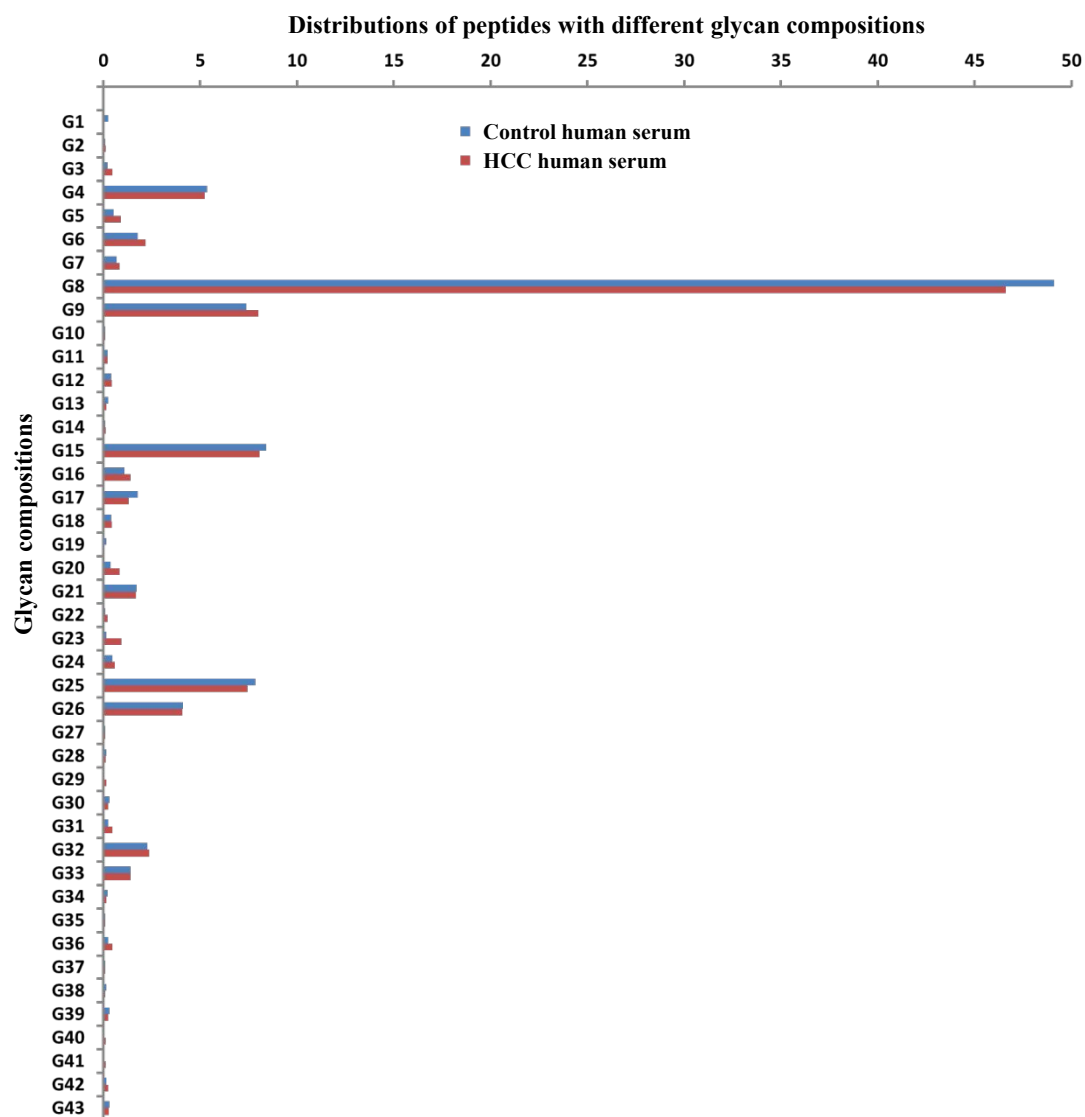

**Figure S4.** The numbers of unique intact glycopeptides bearing the same N-glycans identified from Control and HCC pooled human serum samples. (43 glycans identified at least 4 times were listed in **Table S4**).

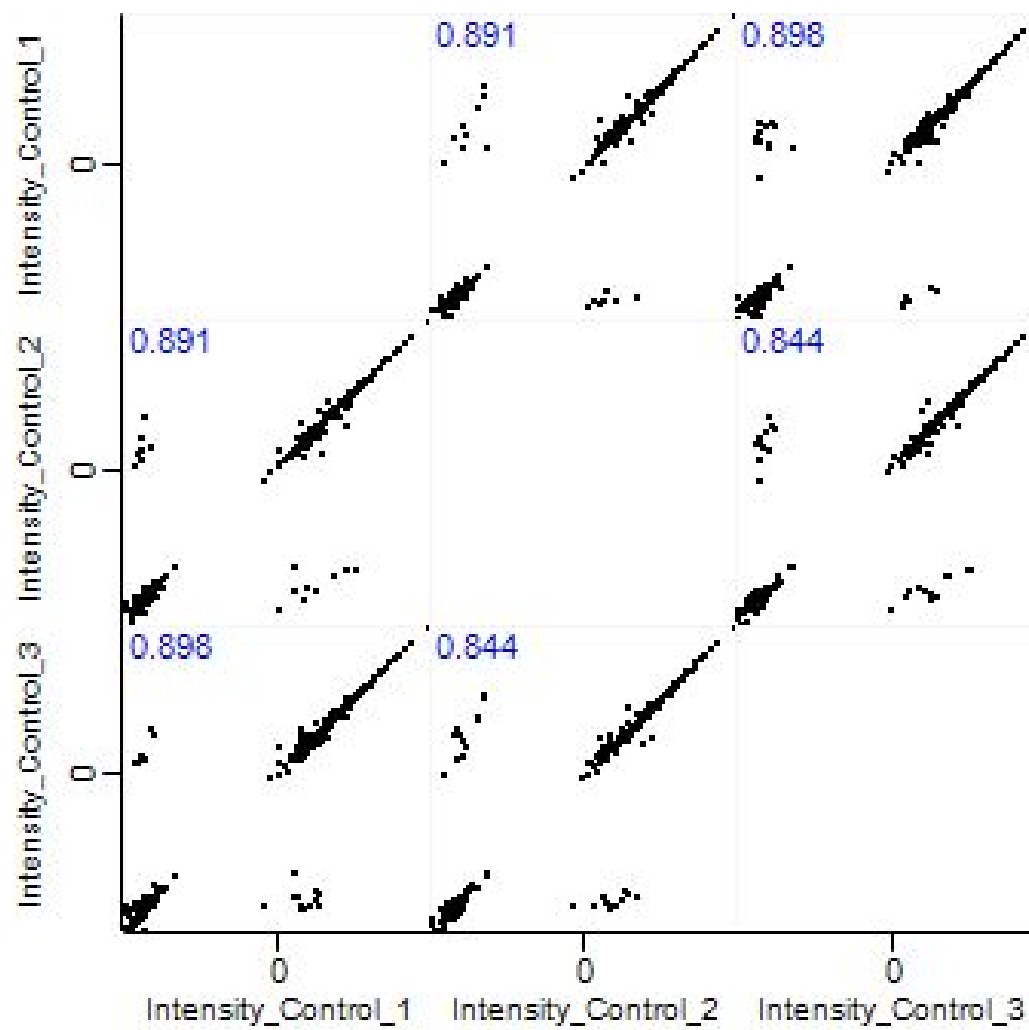

**Figure S5.** The repeatability of the quantitative analysis of site-specific glycoforms enriched from human control groups.



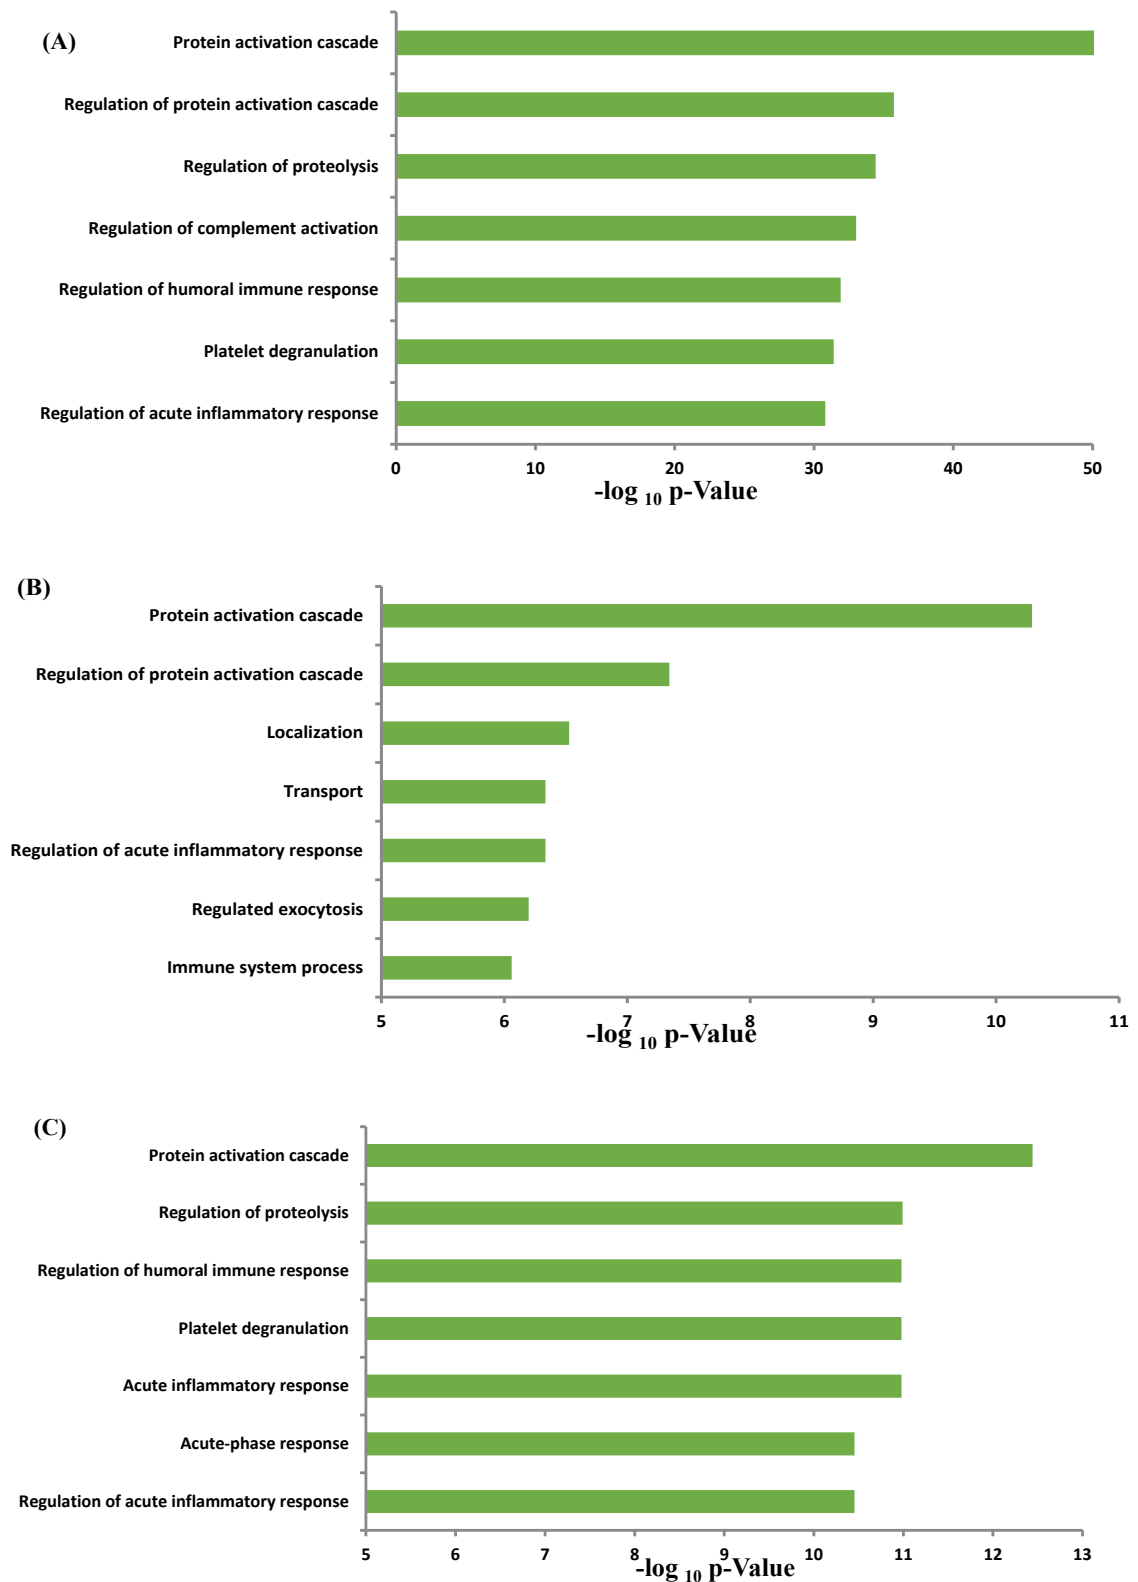

**Figure S6.** Molecular function GO terms enriched for the glycoproteins identified from total glycosites (A), significant change on glycosite level (B) and significant change on site-specific glycoform level (C).
